# Supplementary material for: Chlorine Modulation Fluorescent Performance of Seaweed-Derived Graphene Quantum Dots for Long-Wavelength Excitation Cell-Imaging Application
Source: MDPI journal article supplement (doi:10.3390/molecules26164994), 2021-08-18
Supplement: s1 [file s1]

# Chlorine Modulation Fluorescent Performance of Seaweed-Derived Graphene Quantum Dots for Long-Wavelength Excitation Cell-Imaging Application

Weitao Li <sup>1,2\*</sup>, Ningjia Jiang <sup>1</sup>, Bin Wu <sup>3,\*</sup>, Yuan Liu <sup>4</sup>, Luoman Zhang <sup>1</sup>, and Jianxin He <sup>1,\*</sup>

<sup>1</sup> Textile and Garment Industry of Research Institute, Zhongyuan University of Technology, Zhengzhou 450007, P.R. China; liweitaotao@zut.edu.cn (W.L.); m13470061821@163.com (N.J.); z1543086543@163.com (L.Z.); hejianxin771117@163.com (J.H.)

<sup>2</sup> Institute of Nanochemistry and Nanobiology, School of Environmental and Chemical Engineering, Shanghai University, Shanghai 200444, P.R. China; liweitaotao@zut.edu.cn (W.L.)

<sup>3</sup> School of Life Science and Technology, Tongji University, Shanghai 200082, P.R. China; tyronwb@163.com (B.W.)

<sup>4</sup> Anhui Institute of Metrology, Anhui 230051, P.R. China; 18801911141@163.com (Y.L.)

\* Correspondence: liweitaotao@zut.edu.cn (W.L.); tyronwb@163.com (B.W.); hejianxin771117@163.com (J.H.)

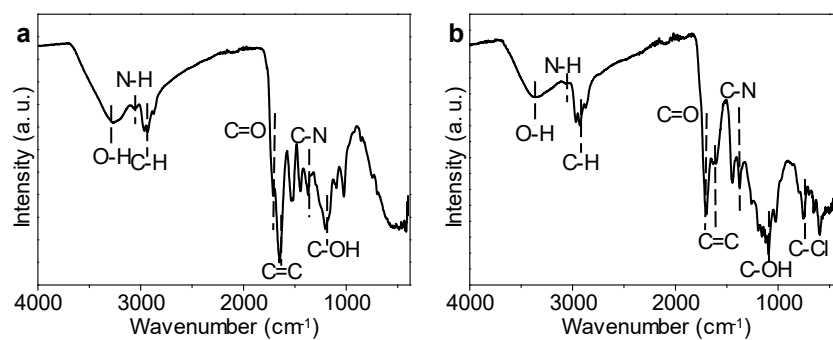

**Figure S1.** FT-IR spectra of (a) GQDs and (b) Cl-GQDs.

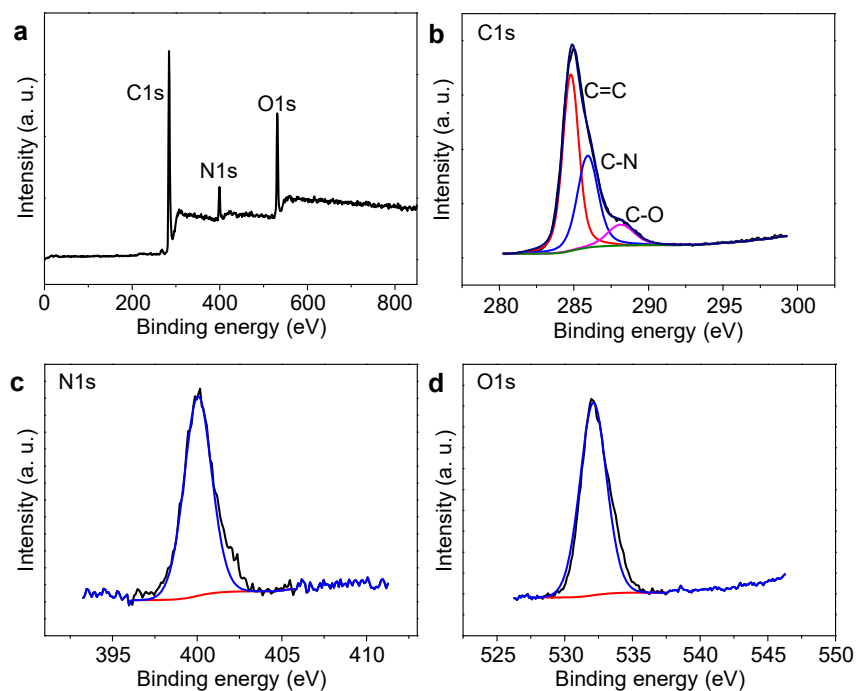

**Figure S2.** Structure Characterization of GQDs: (a) XPS survey spectrum, (b) C1s, (c) N1s, (d) O1s.

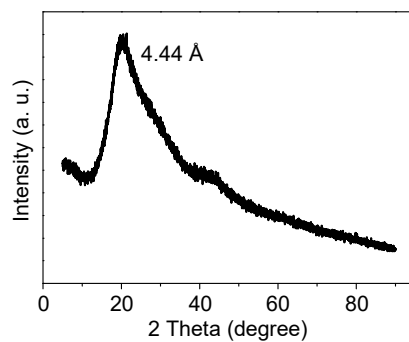

**Figure S3.** XRD patterns of GQDs.

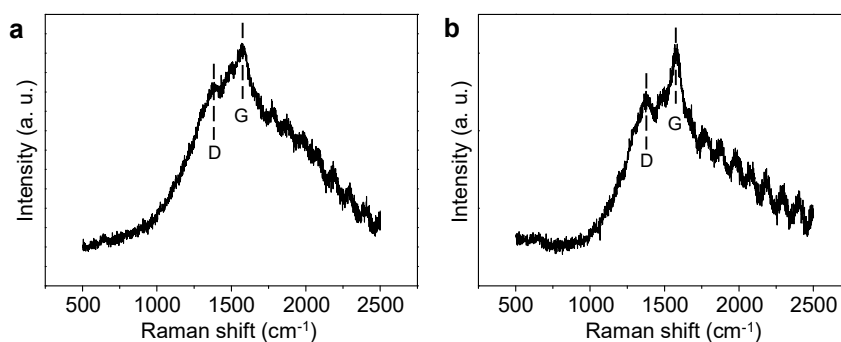

**Figure S4.** The typical Raman spectra of (a) GQDs and (b) CI-GQDs.

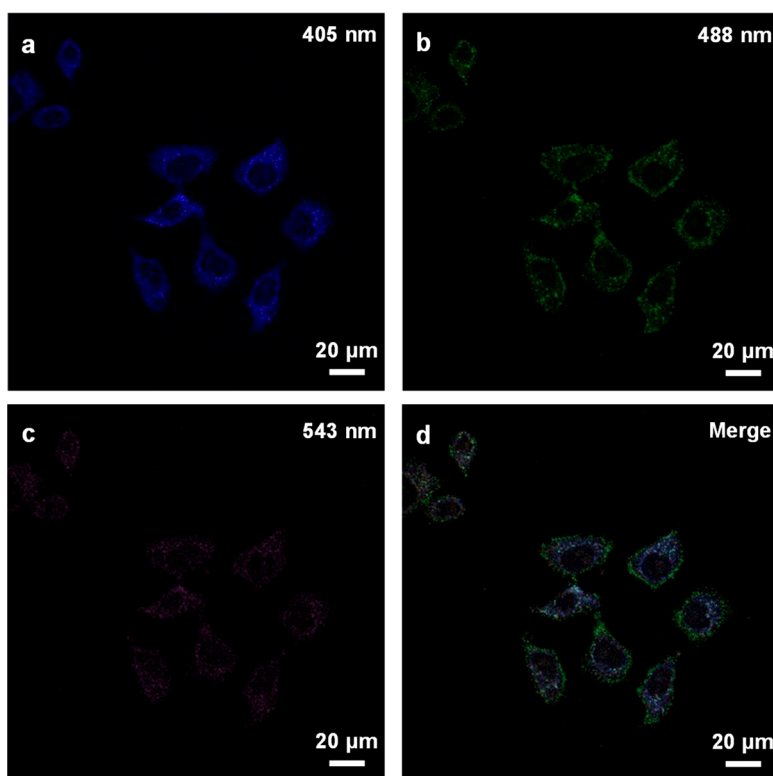

**Figure S5.** Cell-imaging of GQDs using HeLa cells excited at (a) 405 nm, (b) 488 nm, (c) 543 nm and (d) merged image.

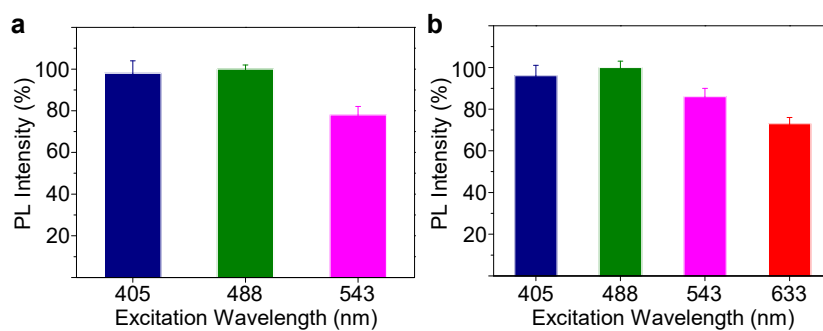

**Figure S6.** Fluorescence intensity analysis of HeLa cells at 405, 488, 543 and 633 nm by Image J: (a) GQDs and (b) CI-GQDs.

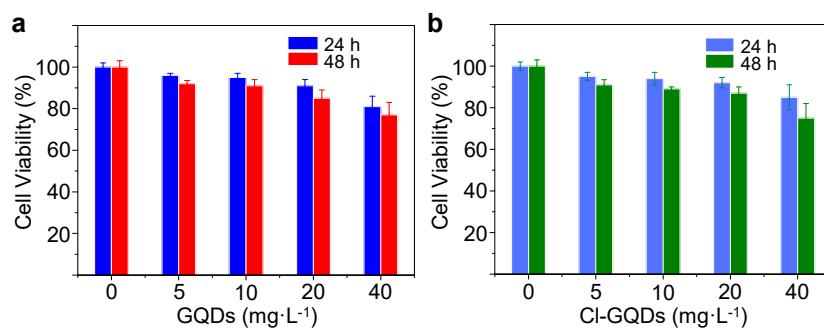

**Figure S7.** Cytotoxicity assessment of (a) GQDs and (b) Cl-GQDs at the imaging dose (5 mg·L<sup>-1</sup>) and higher doses for incubation time varied from 24 to 48 h using HeLa cells. (3 measurements per group)

**Table S1.** The elements ratio of different Cl-doping GQDs in XPS survey spectra.

| TCM ratio | Elements |       |       |       |
|-----------|----------|-------|-------|-------|
|           | Cl (%)   | C (%) | O (%) | N (%) |
| 0%        | 0        | 76.10 | 15.96 | 7.94  |
| 10%       | 0.50     | 74.00 | 17.05 | 8.45  |
| 30%       | 2.38     | 74.42 | 19.03 | 4.17  |
| 50%       | 2.31     | 74.63 | 15.56 | 7.50  |
